# Supplementary material
Source: PubMed Central journal article supplement (PMC3351347)
Supplement: supp_M112.356394_jbc.M112.356394-2.pdf [file supp_M112.356394_jbc.M112.356394-2.pdf]

**Table S1. Oligonucleotides used to identify CdxBS in the *Pax3* NCE2 by EMSA.**

| Probe                        | Sequence                                       |
|------------------------------|------------------------------------------------|
| 1                            | 5'-AGGCTAGGCACAATGGTACCTTCTCTAAGGACAGAC-3'     |
| 2                            | 5'-AAGGACAGACAGTCTTTACAACACTCCTGGCGTCATATCC-3' |
| 3                            | 5'-CGTCATATCCTGCTGGGGACACTTCAGCTCCTAGCCAAGA-3' |
| 4                            | 5'-CTAGCCAAGACGTTGCTTCTTTTATTTTCCAGCAGTTA-3'   |
| 5                            | 5'-CAGCAGTTAGTCTGAATGCCATAATAAATTCCTGAGAAC-3'  |
| 6                            | 5'-TCCTGAGAACAAACGCTGCACCCGGGCAAAACCTCAACAT-3' |
| 7                            | 5'-ACCTCAACATATAGATGCAAGTGCATCGGGGATGAATGTG-3' |
| 8                            | 5'-GATGAATGTGTACGTGGAGATTTAAAGTCCCCGCTTCTCA-3' |
| <b>Consensus CdxBS Hoxb8</b> | 5'-GACCGCTATAAAAGTTTATAGGGTATAAATTTCTGA-3'     |
| <b>CdxBS1mut</b>             | 5'-CAGCAGTTTAGTCTGAATGCCATAATACCTTCCTGAGAAC-3' |
| <b>CdxBS3mut</b>             | 5'-AAGGACAGACAGTCTCGACAACACTCCTGGCGTCATATCC-3' |

Putative, consensus or mutated CdxBS sequences are underlined, overlapping sequences are in italics and point mutations are denoted in bold
