# Supplementary material
Source: PubMed Central journal article supplement (PMC3351347)
Supplement: supp_M112.356394_jbc.M112.356394-3.pdf [file supp_M112.356394_jbc.M112.356394-3.pdf]

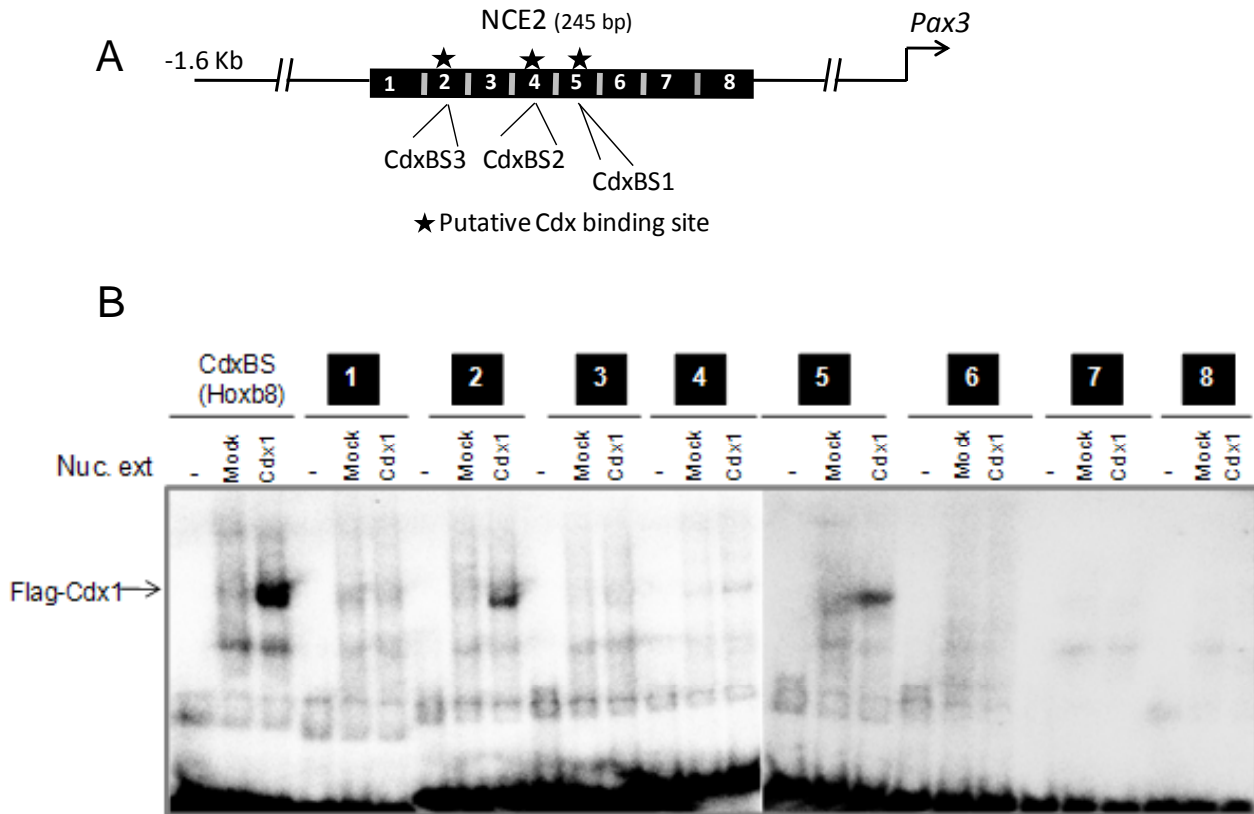

**Figure S2: Identification of Cdx binding sites in the *Pax3* NCE2.** (A) Schematic representation of the *Pax3* NCE2 showing the relative location of all three putative Cdx binding sites (CdxBS1, CdxBS2 and CdxBS3) as well as the 8 overlapping oligonucleotides (denoted 1-8) used to scan the NCE2 for Cdx binding sites in gel shift assay. (B) Identification of Cdx binding sites in the *Pax3* NCE2 by electrophoretic mobility shift assay (EMSA). A probe containing a consensus CdxBS present in the *Hoxb8* promoter was used as a positive control. Each probe was incubated or not (-) with nuclear extracts from mock or Flag-Cdx1 (Cdx1) transfected Cos7 cells. Note that strong Cdx binding is only observed with oligonucleotide probes 2 and 5 bearing respectively the CdxBS3 and CdxBS1.
